# Supplementary material for: Prevalence and Antimicrobial Resistance Profiles of Foodborne Pathogens Isolated from Dairy Cattle and Poultry Manure Amended Farms in Northeastern Ohio, the United States
Source: MDPI journal article supplement (doi:10.3390/antibiotics10121450), 2021-11-25
Supplement: s1 [file s1]

**Table S1.** PCR primer used for the identification of different foodborne pathogens.

| Pathogen                      | Target gene    | Primer sequence                                                        | Amplicon size | PCR conditions                                                                                                                                  | Reference              |
|-------------------------------|----------------|------------------------------------------------------------------------|---------------|-------------------------------------------------------------------------------------------------------------------------------------------------|------------------------|
| <i>E. coli</i> O157:H7        | O157           | RfbF: GTGTCCATTTATACGGACATCCATG<br>RfbR: CCTATAACGTCATGCCAATATTGCC     | 292           | Initial denaturation step at 94°C for 3 min; 35 cycles of 94°C for 30s, 59°C for 60s, and 72°C for 60s; and one final cycle of 72°C for 7 min   | (Hu et al., 1999)      |
|                               | H7             | FLIch7: FGCGCTGTCGAGTTCTATCGAGC<br>FLIch7-RCAACGGTGACTTATCGCCATTCC     | 625           | Initial denaturation step at 94°C for 3 min; 35 cycles of 94°C for 30s, 59°C for 60s, and 72°C for 60s; and one final cycle of 72°C for 7 min   | (Hu et al., 1999)      |
|                               | Intimin        | IntF : GACTGTCGATGCATCAGGCAAAG<br>IntR : TTGGAGTATTAACATTAACCCCAGG     | 368           | Initial denaturation step at 94°C for 3 min; 35 cycles of 94°C for 30s, 59°C for 60s, and 72°C for 60s; and one final cycle of 72°C for 7 min   | (Hu et al., 1999)      |
|                               | SLT-I          | SLT-IF: TGTAAGTGGAAAGGTGGAGTATAC<br>SLT-IR: GCTATTCTGAGTCAACGAAAAATAAC | 210           | Initial denaturation step at 94°C for 3 min; 35 cycles of 94°C for 30s, 59°C for 60s, and 72°C for 60s; and one final cycle of 72°C for 7 min   | (Hu et al., 1999)      |
|                               | SLT-II         | SLT-IIF: GTTTTCTTCGGTATCCTATTCCG<br>SLT-IIR: GATGCATCTCTGGTCATTGTATTAC | 483           | Initial denaturation step at 94°C for 3 min; 35 cycles of 94°C for 30s, 59°C for 60s, and 72°C for 60s; and one final cycle of 72°C for 7 min   | (Hu et al., 1999)      |
| <i>Salmonella</i>             | <i>invA</i>    | S139F: GTGAAATTATCGCCACGTTCTGGGCAA<br>S141R: TCATCGCACCGTCAAAGGAACC    | 284           | Initial denaturation step at 94°C for 3 min; 35 cycles of 94°C for 1min, 53°C for 2min, and 72°C for min; and one final cycle of 72°C for 7 min | (Rahn et al., 1992)    |
| <i>Listeria monocytogenes</i> | <i>Imo0737</i> | F: AGGGCTTCAAGGACTTACCC<br>R: ACGATTTCTGCTTGCCATTC                     | 691           | Initial denaturation step at 94°C for 3 min; 35 cycles of 94°C for 24s, 53°C for 69s, and 72°C for 69s; and one final cycle of 72°C for 7 min   | (Doumith et al., 2004) |
|                               | <i>Imo1118</i> | F: AGGGGTCTTAAATCCTGGAA<br>R: CGGCTTGTTCCGCATACTTA                     | 906           | Initial denaturation step at 94°C for 3 min; 35 cycles of 94°C for 24s, 53°C for 69s, and 72°C for 69s; and one final cycle of 72°C for 7 min   | (Doumith et al., 2004) |
|                               | ORF2819        | F: AGCAAAATGCCAAACTCGT<br>R: CATCACTAAAGCCTCCCATTTG                    | 471           | Initial denaturation step at 94°C for 3 min; 35 cycles of 94°C for 24s, 53°C for 69s, and 72°C for 69s; and one final cycle of 72°C for 7 min   | (Doumith et al., 2004) |

|                              |             |                                                          |     |                                                                                                                                                |                                 |
|------------------------------|-------------|----------------------------------------------------------|-----|------------------------------------------------------------------------------------------------------------------------------------------------|---------------------------------|
|                              | ORF2110     | F: AGTGGACAATTGATTGGTGAA<br>R: CATCCATCCCTTACTTTGGAC     | 597 | Initial denaturation step at 94°C for 3 min; 35 cycles of 94°C for 24s, 53°C for 69s, and 72°C for 69s; and one final cycle of 72°C for 7 min  | (Doumith et al., 2004)          |
|                              | <i>hlyA</i> | F: CCTAACATATCCAGGTGCTCTC<br>R: CTGATTGCGCCGAAGTTTAC     | 350 | Initial denaturation step at 94°C for 3 min; 35 cycles of 94°C for 24s, 53°C for 69s, and 72°C for 69s; and one final cycle of 72°C for 7 min  | (Doumith et al., 2004)          |
| <i>Campylobacter</i><br>spp. | 16s rRNA    | C412F: GGATGACACTTTTCGGAGC<br>C1228R: CATTGTAGCACGTGTGTC | 816 | Initial denaturation step at 94°C for 15 min; 25 cycles of 95°C for 30s, 58°C for 90s, and 72°C for 60s; and one final cycle of 72°C for 7 min | (Yamazaki-Matsune et al., 2007) |

**Table S2:** Interpretive Criteria for Minimum Inhibitory Concentrations

| Bacteria            | Antimicrobial class        | Mode of action                                           | Antimicrobial Agents          | Minimum Inhibitory Concentration interpretive criteria (µg/mL) * |          |      | Reference                |
|---------------------|----------------------------|----------------------------------------------------------|-------------------------------|------------------------------------------------------------------|----------|------|--------------------------|
|                     |                            |                                                          |                               | S                                                                | I        | R    |                          |
| <i>E. coli</i> O157 | Aminoglycosides            | Inhibit protein synthesis                                | Streptomycin                  | ≤32                                                              | -        | ≥64  | (NARMS, 2019)            |
|                     |                            |                                                          | Kanamycin                     | ≤16                                                              | 32       | ≥64  | (CLSI, 2015)             |
|                     |                            |                                                          | Gentamycin                    | ≤4                                                               | 8        | ≥16  | (CLSI, 2015)             |
|                     | β-lactam                   | Inhibit cell wall synthesis                              | Amoxicillin                   | ≤8                                                               | 16       | ≥32  | (NARMS, 2019)            |
|                     |                            | Inhibit the bacterial DNA gyrase enzyme, and replication | Nalidixic acid                | ≤16                                                              | -        | ≥32  | (NARMS, 2019)            |
|                     | Quinolones                 |                                                          |                               |                                                                  |          |      |                          |
|                     | Phenicol                   | Inhibit protein synthesis                                | Ciprofloxacin                 | ≤1                                                               | 2        | ≥4   | (CLSI, 2015)             |
|                     |                            |                                                          | Chloramphenicol               | 8                                                                | 16       | 32   | (CLSI, 2015)             |
|                     |                            |                                                          | Tetracycline                  | ≤4                                                               | 8        | ≥16  | (CLSI, 2015)             |
|                     | Tetracyclines              | Inhibit protein synthesis                                | Ceftriaxone                   | ≤1                                                               | 2        | ≥4   | (NARMS, 2019)            |
|                     |                            | Inhibit cell wall synthesis                              | Cefoxitin                     | ≤8                                                               | 16       | ≥32  | (NARMS, 2019)            |
|                     | Cephems                    | Inhibit protein synthesis                                | Azithromycin                  | ≤16                                                              | -        | ≥32  | (NARMS, 2019)            |
|                     |                            |                                                          | Sulfisoxazole                 | ≤256                                                             | -        | ≥512 | (NARMS, 2019)            |
|                     | Macrolides                 | Inhibit protein synthesis                                |                               |                                                                  |          |      |                          |
|                     | Folate pathway antagonists | Inhibit folate action                                    |                               |                                                                  |          |      |                          |
|                     |                            |                                                          |                               |                                                                  |          |      |                          |
|                     | Penicillin                 | Inhibit cell wall synthesis                              | Trimethoprim sulfamethoxazole | ≤2                                                               | -        | ≥4   | (NARMS, 2019)            |
|                     |                            |                                                          | Ampicillin                    | ≤8                                                               | 16       | ≥32  | (CLSI, 2015)             |
|                     |                            |                                                          | Meropenem                     | ≤1                                                               | 2        | ≥4   | (NARMS, 2019)            |
|                     | Polymyxins                 | Disrupt cell wall integrity                              | Colistin                      | ≤2                                                               | -        | ≥2   | (Matuschek et al., 2018) |
| <i>Salmonella</i>   | Aminoglycosides            | Inhibit protein synthesis                                | Streptomycin                  | ≤32                                                              | -        | ≥64  | (NARMS, 2019)            |
|                     |                            |                                                          | Kanamycin                     | ≤16                                                              | 32       | ≥64  | (CLSI, 2015)             |
|                     |                            |                                                          | Gentamycin                    | ≤4                                                               | 8        | ≥16  | (CLSI, 2015)             |
|                     | β-lactam                   | Inhibit cell wall synthesis                              | Amoxicillin                   | ≤8                                                               | 16       | ≥32  | (NARMS, 2019)            |
|                     |                            | Inhibit the bacterial DNA gyrase enzyme, and replication | Ciprofloxacin                 | ≤0.06                                                            | 0.12-0.5 | ≥1   | (CLSI, 2015)             |
|                     | Quinolones                 |                                                          |                               |                                                                  |          |      |                          |
|                     | Phenicol                   | Inhibit protein synthesis                                | Nalidixic acid                | ≤16                                                              | -        | ≥32  | (NARMS, 2019)            |
|                     |                            |                                                          | Chloramphenicol               | ≤8                                                               | 16       | ≥32  | (CLSI, 2015)             |
|                     |                            |                                                          | Tetracycline                  | ≤4                                                               | 8        | ≥16  | (CLSI, 2015)             |
|                     | Tetracyclines              | Inhibit protein synthesis                                | Ceftriaxone                   | ≤1                                                               | 2        | ≥4   | (NARMS, 2019)            |
|                     |                            | Inhibit cell wall synthesis                              | Cefoxitin                     | ≤8                                                               | 16       | ≥32  | (NARMS, 2019)            |
|                     | Cephems                    | Inhibit protein synthesis                                | Azithromycin                  | ≤16                                                              | -        | ≥32  | (NARMS, 2019)            |
|                     |                            |                                                          |                               |                                                                  |          |      |                          |
|                     | Macrolides                 | Inhibit protein synthesis                                |                               |                                                                  |          |      |                          |
|                     |                            |                                                          |                               |                                                                  |          |      |                          |

|                         |                            |                                                          |                               |              |     |             |                             |
|-------------------------|----------------------------|----------------------------------------------------------|-------------------------------|--------------|-----|-------------|-----------------------------|
| <i>L. monocytogenes</i> | Folate pathway antagonists | Inhibit folate action                                    | Sulfisoxazole                 | $\leq 256$   | -   | $\geq 512$  | (NARMS, 2019)               |
|                         |                            |                                                          | Trimethoprim sulfamethoxazole | $\leq 2$     | -   | $\geq 4$    | (NARMS, 2019)               |
|                         | Penicillin                 | Inhibit cell wall synthesis                              | Ampicillin                    | $\leq 8$     | 16  | $\geq 32$   | (CLSI, 2015)                |
|                         | Penem                      | Inhibit cell wall synthesis                              | Meropenem                     | $\leq 1$     | 2   | $\geq 4$    | (NARMS, 2019)               |
|                         | Polymyxins                 | Disruption of cell wall integrity                        | Colistin                      | $\leq 2$     | -   | $\geq 2$    | (Matuschek et al., 2018)    |
|                         | Penicillin                 | Inhibit cell wall synthesis                              | Ampicillin                    | $\leq 1$     | -   | $\geq 1$    | (EUCAST, 2018)              |
|                         |                            |                                                          | Penicillin G                  | $\leq 1$     | -   | $\geq 1$    | (EUCAST, 2018)              |
|                         | Phenicol                   | Inhibit protein synthesis                                | Chloramphenicol               | $\leq 8$     | 16  | $\geq 32$   | (Ruiz-Bolivar et al., 2011) |
|                         | Quinolones                 | Inhibit the bacterial DNA gyrase enzyme, and replication | Ciprofloxacin                 | $\leq 1$     | 2   | $\geq 4$    | (Ruiz-Bolivar et al., 2011) |
|                         |                            |                                                          | Nalidixic acid                | $\leq 8$     | -   | $\geq 16$   | (Ruiz-Bolivar et al., 2011) |
|                         | Aminoglycosides            | Inhibit protein synthesis                                | Kanamycin                     | $\leq 16$    | 32  | $\geq 64$   | (CLSI, 2015)                |
|                         |                            |                                                          | Gentamycin                    | $\leq 4$     | 8   | $\geq 16$   | (CLSI, 2015)                |
|                         |                            |                                                          | Streptomycin                  | $\leq 8$     | -   | $\geq 16$   | (CLSI, 2015)                |
|                         | Macrolides                 | Inhibit protein synthesis                                | Erythromycin                  | $\leq 0.5$   | 1-4 | $\geq 8$    | (Ruiz-Bolivar et al., 2011) |
|                         |                            |                                                          | Azithromycin                  | $\leq 0.06$  | -   | $\geq 1$    | (Madeo et al., 2015)        |
|                         | Tetracyclines              | Inhibit protein synthesis                                | Tetracycline                  | $\leq 4$     | 8   | $\geq 16$   | (Ruiz-Bolivar et al., 2011) |
|                         | Cephems                    | Inhibit cell wall synthesis                              | Ceftriaxone                   | $\leq 4$     | -   | $\geq 8$    | ((Madeo et al., 2015)       |
|                         |                            |                                                          | Cefoxitin                     | $\leq 4$     | -   | $\geq 8$    | (Chen et al., 2018)         |
|                         | Lincomycin                 | Inhibit protein synthesis                                | Clindamycin                   | $\leq 0.06$  | -   | 2           | (Madeo et al., 2015)        |
|                         | Folate pathway antagonists | Inhibit folate action                                    | Trimethoprim sulfamethoxazole | $\leq 0.06$  | -   | $\geq 0.06$ | (EUCAST, 2020)              |
|                         | Nitrofurantoin             | Inactivate ribosomal protein                             | Nitrofurantoin                | $\leq 32$    | 64  | $\geq 128$  | (Chen et al., 2018)         |
|                         | Glycopeptide               | Inhibit cell wall synthesis                              | Vancomycin                    | $\leq 0.125$ | -   | 2           | ((Granier et al., 2011)     |
|                         | Fluoroquinolone            | Inhibit DNA synthesis                                    | Levofloxacin                  | $\leq 0.06$  | -   | 2           | (Madeo et al., 2015)        |
|                         | Oxazolidinone              | Inhibit protein synthesis                                | Linezolid                     | $\leq 0.5$   | -   | 4           | (Granier et al., 2011)      |
|                         | Penem                      | Inhibit cell wall synthesis                              | Meropenem                     | $\leq 0.25$  | -   | $\geq 0.25$ | (EUCAST, 2020)              |
|                         | Antimycobacterial          | Inhibition of RNA synthesis                              | Rifampicin                    | $< 0.25$     | -   | 0.5         | (Granier et al., 2011)      |

|                      |                 |                                                          |                 |             |    |            |                        |
|----------------------|-----------------|----------------------------------------------------------|-----------------|-------------|----|------------|------------------------|
| <i>Campylobacter</i> | Penicillin      | Inhibit cell wall synthesis                              | Ampicillin      | $\leq 8$    | 16 | $\geq 32$  | (Kashoma et al., 2015) |
|                      |                 |                                                          | Penicillin      | $\leq 1$    | -  | $\geq 64$  | (Haruna et al., 2012)  |
|                      | Phenicol        | Inhibit protein synthesis                                | Chloramphenicol | $\leq 16$   | -  | $\geq 32$  | (NARMS, 2019)          |
|                      |                 |                                                          | Florfenicol     | $\leq 4$    |    | $\geq 8$   | (NARMS, 2019)          |
|                      | Quinolones      | Inhibit the bacterial DNA gyrase enzyme, and replication | Ciprofloxacin   | $\leq 0.5$  | -  | $\geq 1$   | (NARMS, 2019)          |
|                      |                 |                                                          | Nalidixic acid  | $\leq 16$   |    | $\geq 32$  | (NARMS, 2019)          |
|                      | Aminoglycosides | Inhibit protein synthesis                                | Streptomycin    | $\leq 2$    | 4  | $\geq 8$   | (Kashoma et al., 2015) |
|                      |                 |                                                          | Gentamycin      | $\leq 2$    | -  | $\geq 4$   | (NARMS, 2019)          |
|                      |                 |                                                          | Kanamycin       | $\leq 16$   | 32 | $\geq 64$  | (CLSI, 2015)           |
|                      | Macrolides      | Inhibit protein synthesis                                | Erythromycin    | $\leq 4$    | -  | $\geq 8$   | (NARMS, 2019)          |
|                      |                 |                                                          | Azithromycin    | $\leq 0.25$ |    | $\geq 0.5$ | (NARMS, 2019)          |
|                      | Tetracyclines   | Inhibit protein synthesis                                | Tetracycline    | $\leq 1$    | -  | $\geq 2$   | (NARMS, 2019)          |
|                      | ketolides       | Inhibit protein synthesis                                | Telithromycin   | $\leq 4$    |    | $\geq 8$   | (NARMS, 2019)          |
|                      | Lincomycin      | Inhibit protein synthesis                                | Clindamycin     | $\leq 0.5$  |    | $\geq 1$   | (NARMS, 2019)          |

\*S: Susceptible, I: Intermediate, R: Resistance

**Table S3:** Antimicrobial resistance gene primers used for the detection of antimicrobial resistance genes in *E. coli* O157, *Salmonella* *L. monocytogenes* and *Campylobacter*

| Foodborne pathogen  | Antimicrobial agent           | Resistant gene             | Primer <sup>a</sup> : Nucleotide sequence           | Resistance mechanism                 | Annealing Temp (°C) | Fragment length (bp) | References                  |
|---------------------|-------------------------------|----------------------------|-----------------------------------------------------|--------------------------------------|---------------------|----------------------|-----------------------------|
| <i>E. coli</i> O157 | Tetracycline                  | <i>tet(A)</i>              | F: GCTACATCCTGCTTGCCCTTC<br>R: CATAGATCGCCGTGAAGAGG | Efflux pump                          | 50                  | 210                  | (Bryan et al., 2004)        |
|                     | Gentamicin                    | <i>aac(3)-IV</i>           | F: CTTCAGGATGGCAAGTTGGT<br>R: TCATCTCGTTCTCCGCTCAT  | Aminoglycoside acetyltransferase     | 50                  | 286                  | (Saenz et al., 2004)        |
|                     | Streptomycin                  | <i>aadA</i>                | F: GCAGCGCAATGACATTCTTG<br>R: ATCCTTCGGCGCGATTTTG   | Aminoglycoside adenyltransferase     | 50                  | 282                  | (Saenz et al., 2004)        |
|                     | Kanamycin                     | <i>aphA1</i>               | F: ATGGGCTCGCGATAATGTC<br>R: CTCACCGAGGCAGTTCCAT    | Aminoglycoside phosphoryltransferase | 50                  | 600                  | (Rosengren et al., 2009)    |
|                     | Trimethoprim-sulfamethoxazole | <i>sulII</i>               | F: CGGCATCGTCAACATAACCT<br>R: TGTGCGGATGAAGTCAGCTC  | Target modification                  | 52                  | 721                  | (Srinivasan et al., 2005)   |
|                     | Azithromycin                  | <i>mph(A)</i>              | F: GTGAGGAGGAGCTTCGCGAG<br>R: TGCCGCAGGACTCGGAGGTC  | Target modification                  | 59                  | 403                  | (Cho et al., 2019)          |
| <i>Salmonella</i>   | Ampicillin                    | <i>bla<sub>TEM-1</sub></i> | F: CAGCGGTAAGATCCTTGAGA<br>R: ACTCCCCGTCGTGTAGATAA  | β – Lactamase                        | 49                  | 643                  | (Chen et al., 2004)         |
|                     | Streptomycin                  | <i>strA</i>                | F: CTTGGTGATAACGGCAATTC<br>R: CCAATCGCAGATAGAAGGC   | Aminoglycoside phosphoryltransferase | 47                  | 548                  | (Gebreyes and Altier, 2002) |
|                     | Tetracycline                  | <i>tet(B)</i>              | F: TTGGTTAGGGGCAAGTTTTG<br>R: GTAATGGGCCAATAACACCG  | Efflux pump                          | 48.5                | 659                  | (Chen et al., 2004)         |
|                     | Gentamicin                    | <i>aac(3)-IVa</i>          | F: GATGGGCCACCTGGACTGAT<br>R: GCGCTCACAGCAGTGGTCAT  | Aminoglycoside acetyltransferase     | 54.5                | 462                  | (Chen et al., 2004)         |
|                     | Trimethoprim sulfamethoxazole | <i>sulII</i>               | F: CCTGTTTCGTCCGACACAGA<br>R: GAAGCGCAGCCGCAATTCAT  | Target modification                  | 55                  | 435                  | (Chen et al., 2004)         |
|                     | Azithromycin                  | <i>ermB</i>                | F: GAAAAAGTACTCAACCAAATA                            | Target modification                  | 45                  | 639                  | (Mąka et al., 2015)         |

R: AATTTAAGTACCGTTACT

|                         |                             |                  |                                                         |                                         |    |      |                           |
|-------------------------|-----------------------------|------------------|---------------------------------------------------------|-----------------------------------------|----|------|---------------------------|
| <i>L. monocytogenes</i> | Ampicillin                  | <i>ampC</i>      | F: TTCTATCAAMACTGGCARC<br>R: CCYTTTTATGTACCCAYGA        | $\beta$ – Lactamase                     | 45 | 550  | (Srinivasan et al., 2005) |
|                         | Ciprofloxacin               | <i>Lde</i>       | F: ATCGTGAACCTTAATGGTGG<br>R: ATCCTCATATAACTCAAGCG      | Efflux pump                             | 45 | 1518 | (Godreuil et al., 2003)   |
|                         | Erythromycin                | <i>ermB</i>      | F: GAAAAGGTACTCAACCAAATA<br>R: AGTAACGGTACTTAAATTGTTTAC | Target modification                     | 46 | 639  | (Srinivasan et al., 2005) |
|                         | Tetracycline                | <i>Tet(O)</i>    | F: AATGAAGATTCCGACAATTTT<br>R: CTCATGCGTTGTAGTATTCCA    | Efflux pump                             | 45 | 781  | (Li et al., 2007)         |
|                         | Gentamicin                  | <i>aadB</i>      | F: GAGCGAAATCTGCCGCTCTTG<br>R: CTGTTACAACGGACTGGCCGC    | Aminoglycoside<br>adenyltransferase     | 54 | 310  | (Srinivasan et al., 2005) |
|                         | Penicillin G                | <i>penA</i>      | F: ATCGAACAGGCGACGATGTC<br>R: GATTAAGACGGTGTTTTACGG     | Transpeptidases                         | 46 | 500  | (Srinivasan et al., 2005) |
|                         | Cefoxitin                   | <i>cfxA</i>      | F: GCTCAAACAGATAGTTTTAT<br>R: GGCAACATTGTGAGCTG         | $\beta$ – Lactamase                     | 50 | 333  | (Maung et al., 2019)      |
|                         | Clindamycin                 | <i>mefA</i>      | F: AGTATCATTAATCACTAGTGC<br>R: TTCTTCTGGTACTAAAAGTGG    | Target modification                     | 50 | 345  | (Maung et al., 2019)      |
| <i>Campylobacter</i>    | Trimethoprim-sulfamethazole | <i>sulI</i>      | F: CGGCGTGCGCTACCTGAACG<br>R: GCCGATCGCGTGAAGTTCCG      | Target modification                     | 50 | 433  | (Iwu and Okoh, 2019)      |
|                         | Ampicillin                  | <i>blaOXA-61</i> | F: AGAGTATAATACAAGCG<br>R: TAGTGAGTTGTCAAGCC            | $\beta$ - Lactamase                     | 45 | 372  | (Obeng et al., 2012)      |
|                         | Streptomycin                | <i>aadE</i>      | F: GAACAGGATGAACGTATTCG<br>R: GCATATGTGCTATCCAGG        | Aminoglycoside<br>phosphoryltransferase | 45 | 837  | (Obeng et al., 2012)      |
|                         | Tetracycline                | <i>tet(O)</i>    | F: GCGTTTTGTTTATGTGCG<br>R: ATGGACAACCCGACAGAAG         | Antibiotic target<br>protection         | 49 | 559  | (Obeng et al., 2012)      |
|                         | Gentamycin                  | <i>aph-3-l</i>   | F: TGCGTAAAAGATACGGAAG<br>R: CAATCAGGCTTGATCCCC         | Aminoglycoside<br>adenyltransferase     | 49 | 701  | (Obeng et al., 2012)      |

<sup>a</sup> F, forward primer; R, reverse primer

**Table S4:** Antimicrobial resistance profile of the *E. coli* O157 isolates according to manure amendment type and the source of the isolates.

| Antimicrobial agents | Source of isolate and number of resistant isolates (%) |           |           |               |           |           |                |           |           |            |           |           |
|----------------------|--------------------------------------------------------|-----------|-----------|---------------|-----------|-----------|----------------|-----------|-----------|------------|-----------|-----------|
|                      | Dairy cattle (n=13)                                    |           |           | Poultry (n=2) |           |           | Manure (n= 11) |           |           | Soil (n=4) |           |           |
|                      | R No. (%)                                              | I No. (%) | S No. (%) | R No. (%)     | I No. (%) | S No. (%) | R No. (%)      | I No. (%) | S No. (%) | R No. (%)  | I No. (%) | S No. (%) |
| Amp                  | 4 (30.7)                                               | 0         | 9 (69.3)  | 2 (100)       | 0         | 0         | 4 (36.3)       | 0         | 7 (63.6)  | 2 (50)     | 0         | 2 (50)    |
| Chl                  | 0                                                      | 0         | 13 (100)  | 0             | 0         | 2 (100)   | 0              | 0         | 11 (100)  | 0          | 0         | 4 (100)   |
| Cip                  | 0                                                      | 4 (30.7)  | 9 (69.3)  | 0             | 1 (50)    | 1 (50)    | 0              | 4(36.3)   | 7 (63.6)  | 0          | 1 (25)    | 3 (75)    |
| Kan                  | 8 (61.5)                                               | 0         | 5 (39.5)  | 1 (50)        | 1 (50)    | 0         | 7(63.3)        | 0         | 4(36.3)   | 2 (50)     | 1 (25)    | 1 (25)    |
| Nal                  | 0                                                      | 0         | 13 (100)  | 0             | 0         | 2 (100)   | 0              | 0         | 11 (100)  | 0          | 0         | 4 (100)   |
| Str                  | 6 (46.2)                                               | 0         | 7 (53.8)  | 2 (100)       | 0         | 0         | 6(54.5)        | 0         | 5 (45.4)  | 2 (50)     | 0         | 2 (50)    |
| Tet                  | 1 (7)                                                  | 1 (7)     | 11 (84.6) | 1 (50)        | 1 (50)    | 0         | 1 (9)          | 1 (9)     | 9 (82)    | 1 (25)     | 1 (25)    | 2 (50)    |
| Gen                  | 11 (84.6)                                              | 1 (7.7)   | 1 (7.7)   | 2 (100)       | 0         | 0         | 10(91)         | 1 (9)     | 0         | 3 (75)     | 0         | 1 (25)    |
| Amo                  | 1 (7.7)                                                | 0         | 12 (82.3) | 0             | 0         | 2 (100)   | 1(9)           | 0         | 10 (91)   | 0          | 0         | 4 (100)   |
| Cefo                 | 1 (7.7)                                                | 0         | 12 (82.3) | 0             | 0         | 2 (100)   | 1(9)           | 0         | 10 (91)   | 0          | 0         | 4 (100)   |
| Ceft                 | 0                                                      | 0         | 13 (100)  | 0             | 0         | 2 (100)   | 0              | 0         | 11 (100)  | 0          | 0         | 4(100)    |
| Sul                  | 13 (100)                                               | 0         | 0         | 2 (100)       | 0         | 0         | 11(100)        | 0         | 0         | 4 (100)    | 0         | 0         |
| Tri                  | 13 (100)                                               | 0         | 0         | 2 (100)       | 0         | 0         | 11(100)        | 0         | 0         | 4 (100)    | 0         | 0         |
| Azi                  | 11 (84.6)                                              | 0         | 2 (14)    | 0             | 0         | 2 (100)   | 9(81.8)        | 0         | 2 (18.2)  | 2 (50)     | 0         | 2 (50)    |
| Mer                  | 0                                                      | 0         | 13 (100)  | 0             | 0         | 2 (100)   | 0              | 0         | 11 (100)  | 0          | 0         | 4 (100)   |
| Col                  | 1 (7.7)                                                | 0         | 12 (82.3) | 0             | 0         | 2 (100)   | 0              | 0         | 11 (100)  | 1 (25)     | 0         | 3 (75)    |

S, susceptible; I, intermediate; R, resistance

The antimicrobial resistance was determined using the broth microdilution method. Results are shown as number of isolates with the percentage given in parentheses. Amp; ampicillin, Cip; ciprofloxacin, Gen; gentamicin, Str; streptomycin, Tet; tetracycline, Nal; nalidixic acid, Kan; kanamycin, Chl; chloramphenicol, Amo; amoxicillin, Cefo; cefoxitin, Ceft; ceftriaxone, Sul; sulfisoxazole, Tri; Trimethoprim, Azi; azithromycin, Mer: Meropenem, Col: Colistin



**Table S5:** Antimicrobial resistance profile of the *Salmonella* isolates according to manure amendment type and the source of the isolates.

| Antimicrobial agents | Source of isolate and number of resistant isolates (%) |           |           |               |           |           |                |           |           |            |           |           |
|----------------------|--------------------------------------------------------|-----------|-----------|---------------|-----------|-----------|----------------|-----------|-----------|------------|-----------|-----------|
|                      | Dairy cattle (n=6)                                     |           |           | Poultry (n=7) |           |           | Manure (n= 12) |           |           | Soil (n=1) |           |           |
|                      | R No. (%)                                              | I No. (%) | S No. (%) | R No. (%)     | I No. (%) | S No. (%) | R No. (%)      | I No. (%) | S No. (%) | R No. (%)  | I No. (%) | S No. (%) |
| Amp                  | 5 (83.3)                                               | 0         | 1 (16.7)  | 1 (14.2)      | 2 (28)    | 4 (57)    | 6 (50)         | 2 (17.3)  | 4 (33.3)  | 0          | 0         | 1 (100)   |
| Chl                  | 1 (16.7)                                               | 0         | 5 (83.3)  | 0             | 0         | 7 (100)   | 1 (8.3)        | 0         | 11 (91.7) | 0          | 0         | 1 (100)   |
| Cip                  | 0                                                      | 4 (66.6)  | 2 (33.3)  | 3 (42.8)      | 1 (14.2)  | 3 (42.8)  | 1 (8.3)        | 7 (58.3)  | 4 (33.3)  | 0          | 0         | 1 (100)   |
| Kan                  | 2 (33.3)                                               | 2 (33.3)  | 2 (33.3)  | 4 (57)        | 0         | 3 (43)    | 6 (50)         | 2 (17.3)  | 4 (33.3)  | 0          | 0         | 1 (100)   |
| Nal                  | 2 (33.3)                                               | 0         | 4 (66.6)  | 5 (71.4)      | 1 (14.2)  | 1 (14.2)  | 7 (58.3)       | 1(8.3)    | 4 (33.3)  | 0          | 0         | 1 (100)   |
| Str                  | 5 (83.3)                                               | 0         | 1 (16.7)  | 6 (85.7)      | 0         | 1 (14.2)  | 10 (83.3)      | 0         | 2 (16.7)  | 1 (100)    | 0         | 0         |
| Tet                  | 1 (16.7)                                               | 1 (16.7)  | 4 (66.6)  | 2 (28.5)      | 0         | 5 (71.4)  | 3 (25)         | 2 (16.6)  | 7 (58.3)  | 0          | 0         | 1 (100)   |
| Gen                  | 3 (50)                                                 | 1 (16.7)  | 2 (33.3)  | 7 (100)       | 0         | 0         | 9 (75)         | 1 (8.3)   | 2 (17.3)  | 1(100)     | 0         | 0         |
| Amo                  | 1 (16.7)                                               | 0         | 5 (83.3)  | 0             | 0         | 7 (100)   | 1 (8.3)        | 0         | 11 (91.7) | 0          | 0         | 1 (100)   |
| Cefo                 | 1 (16.7)                                               | 1 (16.7)  | 4 (66.6)  | 0             | 0         | 7 (100)   | 1 (8.3)        | 1 (8.3)   | 10 (83.3) | 0          | 0         | 1 (100)   |
| Ceft                 | 1 (16.7)                                               | 0         | 5 (83.3)  | 0             | 0         | 7 (100)   | 1 (8.3)        | 0         | 11 (91.7) | 0          | 0         | 1 (100)   |
| Sul                  | 6 (100)                                                | 0         | 0         | 7 (100)       | 0         | 0         | 12 (100)       | 0         | 0         | 1 (100)    | 0         | 0         |
| Tri                  | 6 (100)                                                | 0         | 0         | 7 (100)       | 0         | 0         | 12 (100)       | 0         | 0         | 1 (100)    | 0         | 0         |
| Azi                  | 3 (50)                                                 | 0         | 3 (50)    | 7 (100)       | 0         | 0         | 9 (75)         | 0         | 3 (25)    | 1 (100)    | 0         | 0         |
| Mer                  | 0                                                      | 0         | 6 (100)   | 0             | 0         | 7 (100)   | 0              | 0         | 12 (100)  | 0          | 0         | 1 (100)   |
| Col                  | 0                                                      | 0         | 6 (100)   | 2 (28.5)      | 0         | 5 (71.5)  | 1 (8.3)        | 0         | 11 (91.7) | 1 (100)    | 0         | 0         |

S, susceptible; I, intermediate; R, resistance

The antimicrobial resistance was determined using the broth microdilution method. Results are shown as number of isolates with the percentage given in parentheses. Amp; ampicillin, Cip; ciprofloxacin, Gen; gentamicin, Str; streptomycin, Tet; tetracycline, Nal; nalidixic acid, Kan; kanamycin, Chl; chloramphenicol, Amo; amoxicillin, Cefo; cefoxitin, Ceft; ceftriaxone, Sul; sulfisoxazole, Tri; Trimethoprim, Azi; azithromycin, Mer: Meropenem, Col: Colistin

**Table S6:** Antimicrobial resistance profile of the *L. monocytogens* isolates according to manure amendment type and the source of the isolates.

| Antimicrobial agents | Source of isolate and number of resistant isolates (%) |           |           |               |           |           |                |           |           |             |           |           |
|----------------------|--------------------------------------------------------|-----------|-----------|---------------|-----------|-----------|----------------|-----------|-----------|-------------|-----------|-----------|
|                      | Dairy cattle (n=58)                                    |           |           | Poultry (n=9) |           |           | Manure (n= 47) |           |           | Soil (n=20) |           |           |
|                      | R No. (%)                                              | I No. (%) | S No. (%) | R No. (%)     | I No. (%) | S No. (%) | R No. (%)      | I No. (%) | S No. (%) | R No. (%)   | I No. (%) | S No. (%) |
| Amp                  | 52 (89.6)                                              | 0         | 6 (8.9)   | 8 (88.8)      | 0         | 1 (11.1)  | 42(89.3)       | 0         | 5 (10.7)  | 18 (90)     | 0         | 2 (10)    |
| Chl                  | 15 (25.6)                                              | 7 (12)    | 36 (62)   | 2 (22.2)      | 1 (11.1)  | 6 (66.6)  | 14(29.7)       | 6 (12.7)  | 27 (57.4) | 3 (15)      | 2 (10)    | 15 (75)   |
| Cip                  | 46 (79.2)                                              | 1 (1.7)   | 11 (16.4) | 7 (77.7)      | 0         | 2 (22.2)  | 38(80.8)       | 1 (2.1)   | 8 (17)    | 15 (75)     | 0         | 5 (25)    |
| Kan                  | 50 (86)                                                | 0         | 8 (84)    | 9 (100)       | 0         | 0         | 42(89.3)       | 0         | 5 (10.7)  | 17 (85)     | 0         | 3 (15)    |
| Nal                  | 55 (94.8)                                              | 0         | 3 (95.2)  | 9 (100)       | 0         | 0         | 44(93.6)       | 0         | 3 (6.3)   | 20 (100)    | 0         | 0         |
| Str                  | 58 (100)                                               | 0         | 0         | 8 (88.8)      | 0         | 1 (11.1)  | 47(100)        | 0         | 0         | 19 (95)     | 0         | 1 (10)    |
| Tet                  | 20 (34)                                                | 0         | 38(66)    | 3 (33.3)      | 0         | 6 (66.6)  | 15(31.9)       | 0         | 32 (68)   | 8 (40)      | 0         | 12 (60)   |
| Gen                  | 44 (75.8)                                              | 0         | 14 (24.2) | 8 (88.8)      | 0         | 1 (11.1)  | 36(76.6)       | 0         | 11 (23.3) | 16 (80)     | 0         | 4 (20)    |
| Pen                  | 28 (48.3)                                              | 0         | 30 (51.7) | 4 (44.4)      | 0         | 5 (55.5)  | 24(51)         | 0         | 23 (49)   | 8 (40)      | 0         | 12 (60)   |
| Ery                  | 22 (37.9)                                              | 0         | 36 (62.1) | 3 (33.3)      | 0         | 6 (66.6)  | 24(51)         | 0         | 23 (49)   | 1 (5)       | 0         | 19 (95)   |
| Ceft                 | 58 (100)                                               | 0         | 0         | 9 (100)       | 0         | 0         | 47(100)        | 0         | 0         | 20 (100)    | 0         | 0         |
| Cli                  | 58 (100)                                               | 0         | 0         | 9 (100)       | 0         | 0         | 47(100)        | 0         | 0         | 20 (100)    | 0         | 0         |
| Lev                  | 52(89.6)                                               | 6 (8.9)   | 0         | 9 (100)       | 0         | 0         | 42(89.3)       | 5 (10.7)  | 0         | 19 (95)     | 1 (5)     | 0         |
| Rif                  | 58 (100)                                               | 0         | 0         | 9 (100)       | 0         | 0         | 47(100)        | 0         | 0         | 20 (100)    | 0         | 0         |
| Tri                  | 58 (100)                                               | 0         | 0         | 9 (100)       | 0         | 0         | 47(100)        | 0         | 0         | 20 (100)    | 0         | 0         |
| Van                  | 39(67)                                                 | 19(33)    | 0         | 6 (66.6)      | 3 (33.3)  | 0         | 31(65.9)       | 16 (34)   | 0         | 14 (70)     | 6 (30)    | 0         |
| Mer                  | 58(100)                                                | 0         | 0         | 9 (100)       | 0         | 0         | 47(100)        | 0         | 0         | 20 (100)    | 0         | 0         |
| Lin                  | 36(62)                                                 | 22 (38)   | 0         | 3 (33.3)      | 6 (66.6)  | 0         | 29(62)         | 18 (38)   | 0         | 10 (50)     | 10 (50)   | 0         |
| Nit                  | 6 (8.9)                                                | 50 (86)   | 2 (3.6)   | 0             | 9 (100)   | 0         | 4(8.5)         | 41 (87)   | 2 (4.2)   | 2 (10)      | 18 (90)   | 0         |
| Azi                  | 58 (100)                                               | 0         | 0         | 9 (100)       | 0         | 0         | 47(100)        | 0         | 0         | 20 (100)    | 0         | 0         |
| Cefo                 | 58 (100)                                               | 0         | 0         | 9 (100)       | 0         | 0         | 47(100)        | 0         | 0         | 20 (100)    | 0         | 0         |

S, susceptible; I, intermediate; R, resistance

The antimicrobial resistance was determined using the broth microdilution method. Results are shown as number of isolates with the percentage given in parentheses. Amp; ampicillin, Cip; ciprofloxacin, Gen; gentamicin, Str; streptomycin, Tet; tetracycline, Nal; nalidixic acid, Kan; kanamycin, Chl; chloramphenicol, Cefo: Cefoxitin, Azi: Azithromycin, Nit: Nitrofurantoin, Lin: Linezolid, Mer: Meropenem, Van: Vancomycin, Tri: Trimethoprim, Rif: Rifampicin, Lev: Levofloxacin, Cli: Clindamycin, Ceft: Ceftriaxone, Ery: Erythromycin, Pen: Penicillin G

**Table S7:** Antimicrobial resistance profile of the *Campylobacter* isolates according to manure amendment type and the source of the isolates.

| Antimicrobial agents | Source of isolate and number of resistant isolates (%) |           |           |               |           |           |                |           |           |            |           |           |
|----------------------|--------------------------------------------------------|-----------|-----------|---------------|-----------|-----------|----------------|-----------|-----------|------------|-----------|-----------|
|                      | Dairy cattle (n=66)                                    |           |           | Poultry (n=2) |           |           | Manure (n= 67) |           |           | Soil (n=1) |           |           |
|                      | R No. (%)                                              | I No. (%) | S No. (%) | R No. (%)     | I No. (%) | S No. (%) | R No. (%)      | I No. (%) | S No. (%) | R No. (%)  | I No. (%) | S No. (%) |
| Amp                  | 61(92.4)                                               | 0         | 5 (7.6)   | 2 (100)       | 0         | 0         | 63 (94)        | 0         | 4 (6)     | 0          | 0         | 1 (100)   |
| Chl                  | 6(9)                                                   | 0         | 60 (91)   | 0             | 0         | 2 (100)   | 6(8.9)         | 0         | 61 (91.1) | 0          | 0         | 1 (100)   |
| Cip                  | 62(93.9)                                               | 0         | 4 (6.1)   | 0             | 0         | 2 (100)   | 62(92.5)       | 0         | 5(7.5)    | 0          | 0         | 1 (100)   |
| Ery                  | 66(100)                                                | 0         | 0         | 1 (50)        | 0         | 1(50)     | 67(100)        | 0         | 0         | 0          | 0         | 1 (100)   |
| Kan                  | 32 (48.4)                                              | 3         | 31 (46.9) | 1 (50)        | 0         | 1(50)     | 32(47.7)       | 3 (4.4)   | 32 (47.7) | 1 (100)    | 0         | 0         |
| Nal                  | 21(31.8)                                               | 0         | 45 (68.1) | 2 (100)       | 0         | 0         | 23(34.3)       | 0         | 44 (65.7) | 0          | 0         | 1 (100)   |
| Str                  | 15(22.7)                                               | 12 (18.1) | 39 (59)   | 0             | 0         | 2 (100)   | 15(22.2)       | 12 (19.7) | 40 (59.7) | 0          | 0         | 1 (100)   |
| Tet                  | 43(65)                                                 | 0         | 23 (35)   | 0             | 0         | 2 (100)   | 43(64)         | 0         | 24 (36)   | 0          | 0         | 1 (100)   |
| Gen                  | 16(24)                                                 | 0         | 50 (76)   | 1 (50)        | 0         | 1 (50)    | 17(25.3)       | 0         | 50 (74.6) | 0          | 0         | 1 (100)   |
| Pen                  | 66(100)                                                | 0         | 0         | 2 (100)       | 0         | 0         | 67(100)        | 0         | 0         | 1(100)     | 0         | 0         |
| Tel                  | 4(6)                                                   | 0         | 62 (94)   | 0             | 0         | 2 (100)   | 4(5.9)         | 0         | 63 (94.1) | 0          | 0         | 1 (100)   |
| Cli                  | 58(87.8)                                               | 0         | 8 (12.2)  | 0             | 0         | 2 (100)   | 58 (86.5)      | 0         | 9(13.4)   | 0          | 0         | 1 (100)   |
| Azi                  | 6(9)                                                   | 0         | 60 (91)   | 0             | 0         | 2 (100)   | 6(8.9)         | 0         | 61 (91.1) | 0          | 0         | 1 (100)   |
| Flo                  | 2(3)                                                   | 0         | 64 (97)   | 0             | 0         | 2 (100)   | 2(2.9)         | 0         | 65 (97.1) | 0          | 0         | 1 (100)   |

S, susceptible; I, intermediate; R, resistance

The antimicrobial resistance was determined using the broth microdilution method. Results are shown as number of isolates with the percentage given in parentheses. Amp; ampicillin, Cip; ciprofloxacin, Gen; gentamicin, Str; streptomycin, Tet; tetracycline, Nal; nalidixic acid, Kan; kanamycin, Chl; chloramphenicol, Pen: Penicillin G, Ery: Erythromycin, Tel: Telithromycin, Cli: Clindamycin, Azi: Azithromycin, Flo: Florfenicol

- Bryan, A., Shapir, N., Sadowsky, M.J., 2004. Frequency and distribution of tetracycline resistance genes in genetically diverse, nonselected, and nonclinical *Escherichia coli* strains isolated from diverse human and animal sources. *Applied and environmental microbiology* 70, 2503-2507.
- Chen, M., Cheng, J., Wu, Q., Zhang, J., Chen, Y., Xue, L., Lei, T., Zeng, H., Wu, S., Ye, Q., Bai, J., Wang, J., 2018. Occurrence, Antibiotic Resistance, and Population Diversity of *Listeria monocytogenes* Isolated From Fresh Aquatic Products in China. *Front Microbiol* 9, 2215.
- Chen, S., Zhao, S., White, D.G., Schroeder, C.M., Lu, R., Yang, H., McDermott, P.F., Ayers, S., Meng, J., 2004. Characterization of multiple-antimicrobial-resistant salmonella serovars isolated from retail meats. *Applied and environmental microbiology* 70, 1-7.
- Cho, S., Nguyen, H.A.T., McDonald, J.M., Woodley, T.A., Hiott, L.M., Barrett, J.B., Jackson, C.R., Frye, J.G., 2019. Genetic Characterization of Antimicrobial-Resistant *Escherichia coli* Isolated from a Mixed-Use Watershed in Northeast Georgia, USA. *International journal of environmental research and public health* 16, 3761.
- CLSI 2015. Performance Standards for Antimicrobial Susceptibility Testing; Twenty-Fifth Informational Supplement.  
<http://www.facm.ucl.ac.be/intranet/CLSI/CLSI-2015-M100-S25-original.pdf>.
- Doumith, M., Buchrieser, C., Glaser, P., Jacquet, C., Martin, P., 2004. Differentiation of the major *Listeria monocytogenes* serovars by multiplex PCR. *Journal of clinical microbiology* 42, 3819-3822.
- EUCAST, 2018. European Committee on Antimicrobial Susceptibility Testing.  
[http://www.eucast.org/fileadmin/src/media/PDFs/EUCAST\\_files/Breakpoint\\_tables/v\\_8.1\\_Breakpoint\\_Tables.pdf](http://www.eucast.org/fileadmin/src/media/PDFs/EUCAST_files/Breakpoint_tables/v_8.1_Breakpoint_Tables.pdf).
- EUCAST 2020. EUCAST breakpoint tables.
- Gebreyes, W.A., Altier, C., 2002. Molecular characterization of multidrug-resistant *Salmonella enterica* subsp. *enterica* serovar Typhimurium isolates from swine. *Journal of clinical microbiology* 40, 2813-2822.
- Godreuil, S., Galimand, M., Gerbaud, G., Jacquet, C., Courvalin, P., 2003. Efflux pump Lde is associated with fluoroquinolone resistance in *Listeria monocytogenes*. *Antimicrobial agents and chemotherapy* 47, 704-708.
- Granier, S.A., Moubareck, C., Colaneri, C., Lemire, A., Roussel, S., Dao, T.-T., Courvalin, P., Brisabois, A., 2011. Antimicrobial Resistance of *Listeria monocytogenes* Isolates from Food and the Environment in France over a 10-Year Period. *Applied and Environmental Microbiology* 77, 2788.
- Haruna, M., Sasaki, Y., Murakami, M., Ikeda, A., Kusukawa, M., Tsujiyama, Y., Ito, K., Asai, T., Yamada, Y., 2012. Prevalence and Antimicrobial Susceptibility of *Campylobacter* in Broiler Flocks in Japan. *Zoonoses and Public Health* 59, 241-245.
- Hu, Y., Zhang, Q., Meitzler, J.C., 1999. Rapid and sensitive detection of *Escherichia coli* O157:H7 in bovine faeces by a multiplex PCR. *Journal of applied microbiology* 87, 867-876.
- Iwu, C.D., Okoh, A.I., 2019. Preharvest Transmission Routes of Fresh Produce Associated Bacterial Pathogens with Outbreak Potentials: A Review. *International journal of environmental research and public health* 16, 4407.
- Kashoma, I.P., Kassem, I.I., Kumar, A., Kessy, B.M., Gebreyes, W., Kazwala, R.R., Rajashekara, G., 2015. Antimicrobial Resistance and Genotypic Diversity of *Campylobacter* Isolated from Pigs, Dairy, and Beef Cattle in Tanzania. *Frontiers in microbiology* 6, 1240-1240.
- Li, Q., Sherwood, J.S., Logue, C.M., 2007. Antimicrobial resistance of *Listeria* spp. recovered from processed bison. *Letters in applied microbiology* 44, 86-91.

- Madeo, M., Musumeci, R., Careddu, A.M.L., Amato, E., Pontello, M.M., Cocuzza, C.E., 2015. Antimicrobial susceptibility of *Listeria monocytogenes* isolates from human cases in northern Italy, 2008–2010: MIC determination according to EUCAST broth microdilution method. *Journal of Chemotherapy* 27, 201-206.
- Matuschek, E., Åhman, J., Webster, C., Kahlmeter, G., 2018. Antimicrobial susceptibility testing of colistin – evaluation of seven commercial MIC products against standard broth microdilution for *Escherichia coli*, *Klebsiella pneumoniae*, *Pseudomonas aeruginosa*, and *Acinetobacter* spp. *Clinical Microbiology and Infection* 24, 865-870.
- Maung, A.T., Mohammadi, T.N., Nakashima, S., Liu, P., Masuda, Y., Honjoh, K.I., Miyamoto, T., 2019. Antimicrobial resistance profiles of *Listeria monocytogenes* isolated from chicken meat in Fukuoka, Japan. *Int J Food Microbiol* 304, 49-57.
- Mąka, Ł., Maćkiw, E., Ścieżyńska, H., Modzelewska, M., Popowska, M., 2015. Resistance to Sulfonamides and Dissemination of sul Genes Among *Salmonella* spp. Isolated from Food in Poland. *Foodborne Pathogens and Disease* 12, 383-389.
- NARMS 2019. National Antimicrobial Resistance Monitoring System for Enteric Bacteria, .
- Obeng, A.S., Rickard, H., Sexton, M., Pang, Y., Peng, H., Barton, M., 2012. Antimicrobial susceptibilities and resistance genes in *Campylobacter* strains isolated from poultry and pigs in Australia. *Journal of Applied Microbiology* 113, 294-307.
- Rahn, K., De Grandis, S.A., Clarke, R.C., McEwen, S.A., Galán, J.E., Ginocchio, C., Curtiss, R., 3rd, Gyles, C.L., 1992. Amplification of an *invA* gene sequence of *Salmonella typhimurium* by polymerase chain reaction as a specific method of detection of *Salmonella*. *Mol Cell Probes* 6, 271-279.
- Rosengren, L.B., Waldner, C.L., Reid-Smith, R.J., 2009. Associations between antimicrobial resistance phenotypes, antimicrobial resistance genes, and virulence genes of fecal *Escherichia coli* isolates from healthy grow-finish pigs. *Applied and environmental microbiology* 75, 1373-1380.
- Ruiz-Bolivar, Z., Neuque-Rico, M.C., Poutou-Pinales, R.A., Carrascal-Camacho, A.K., Mattar, S., 2011. Antimicrobial susceptibility of *Listeria monocytogenes* food isolates from different cities in Colombia. *Foodborne pathogens and disease* 8, 913-919.
- Saenz, Y., Brinas, L., Dominguez, E., Ruiz, J., Zarazaga, M., Vila, J., Torres, C., 2004. Mechanisms of resistance in multiple-antibiotic-resistant *Escherichia coli* strains of human, animal, and food origins. *Antimicrobial agents and chemotherapy* 48, 3996-4001.
- Srinivasan, V., Nam, H.M., Nguyen, L.T., Tamilselvam, B., Murinda, S.E., Oliver, S.P., 2005. Prevalence of antimicrobial resistance genes in *Listeria monocytogenes* isolated from dairy farms. *Foodborne pathogens and disease* 2, 201-211.
- Yamazaki-Matsune, W., Taguchi, M., Seto, K., Kawahara, R., Kawatsu, K., Kumeda, Y., Kitazato, M., Nukina, M., Misawa, N., Tsukamoto, T., 2007. Development of a multiplex PCR assay for identification of *Campylobacter coli*, *Campylobacter fetus*, *Campylobacter hyointestinalis* subsp. *hyointestinalis*, *Campylobacter jejuni*, *Campylobacter lari* and *Campylobacter upsaliensis*. *Journal of medical microbiology* 56, 1467-1473.

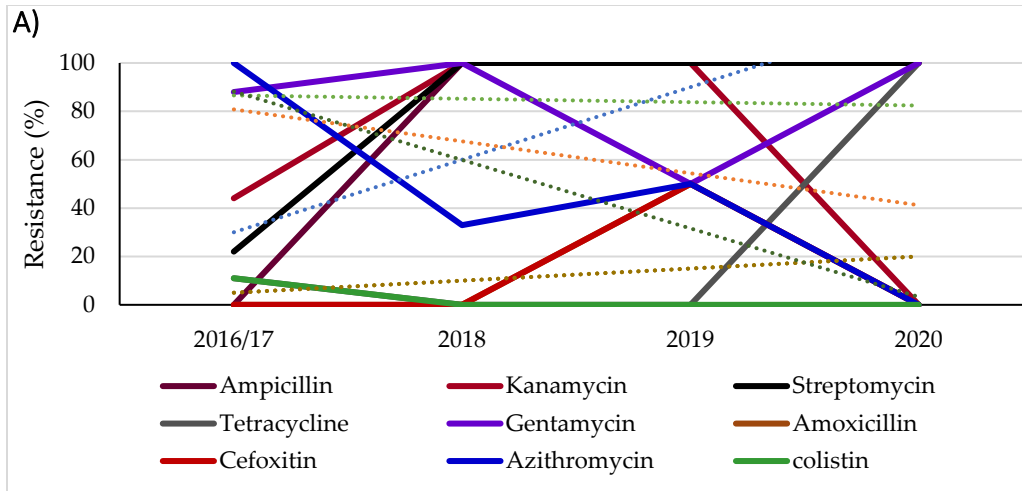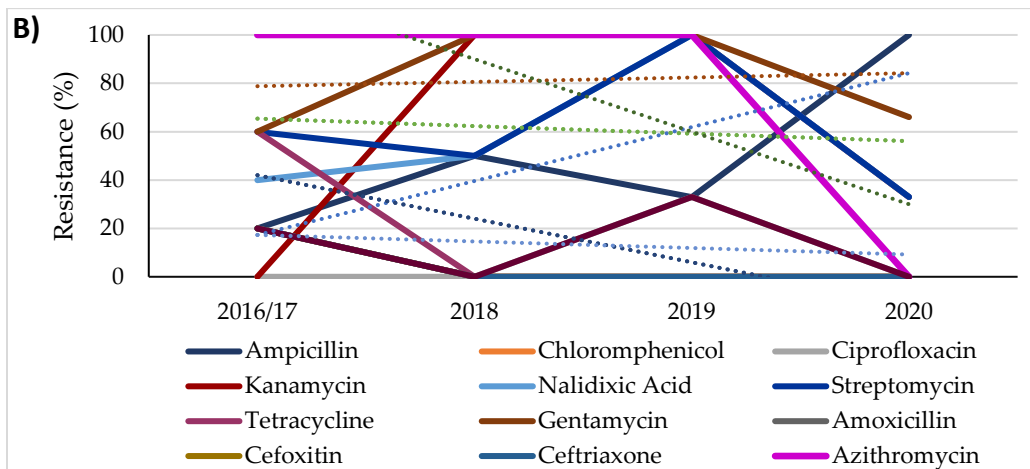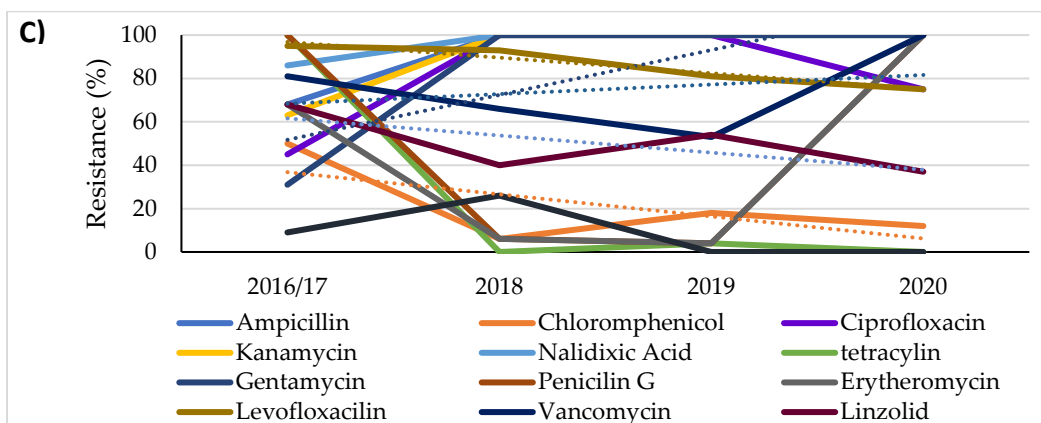

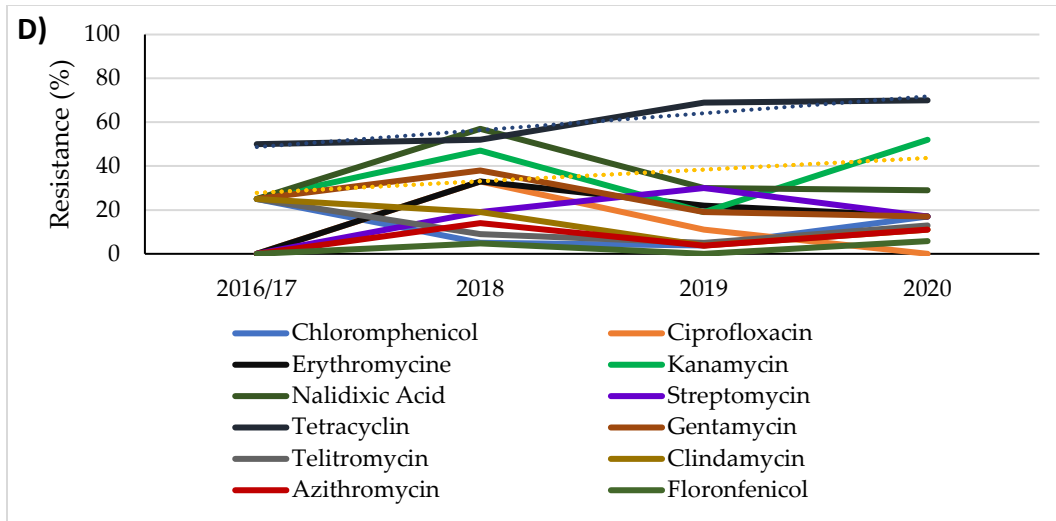

**Figure S1.** Antimicrobial resistance trend in different foodborne pathogens between 2016 and 2020.

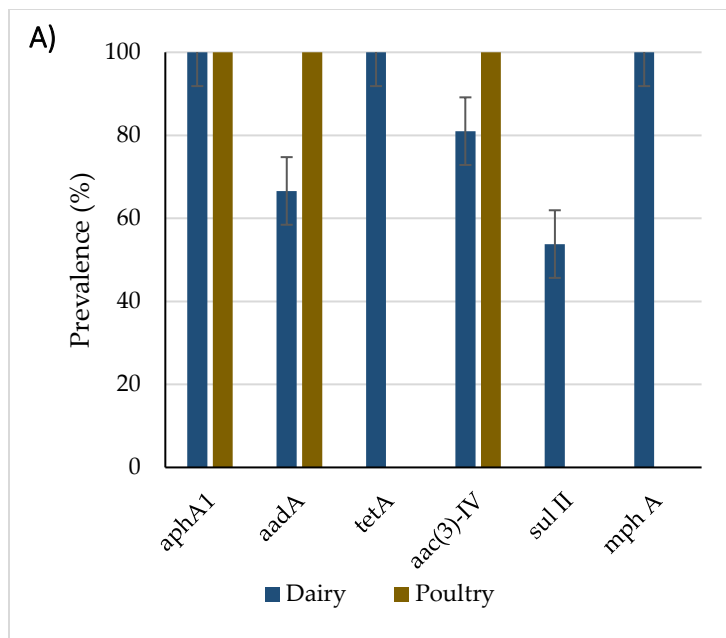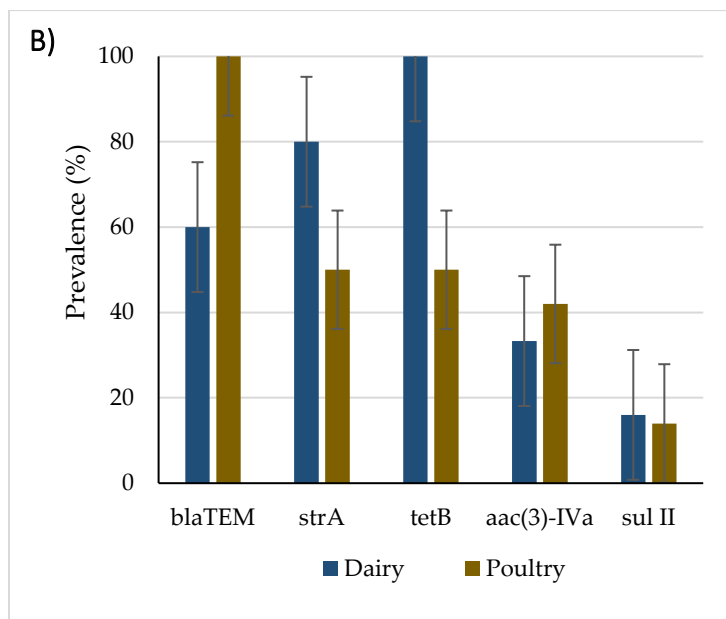



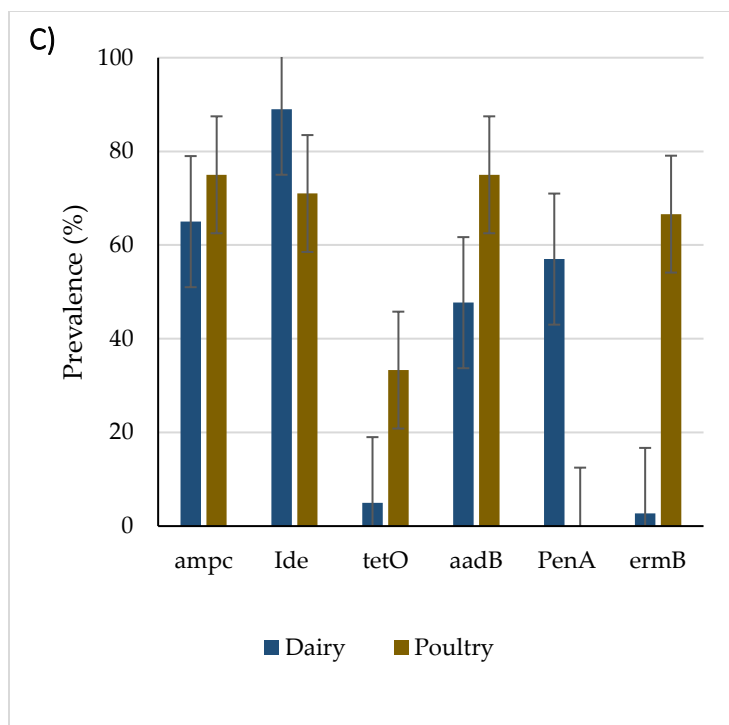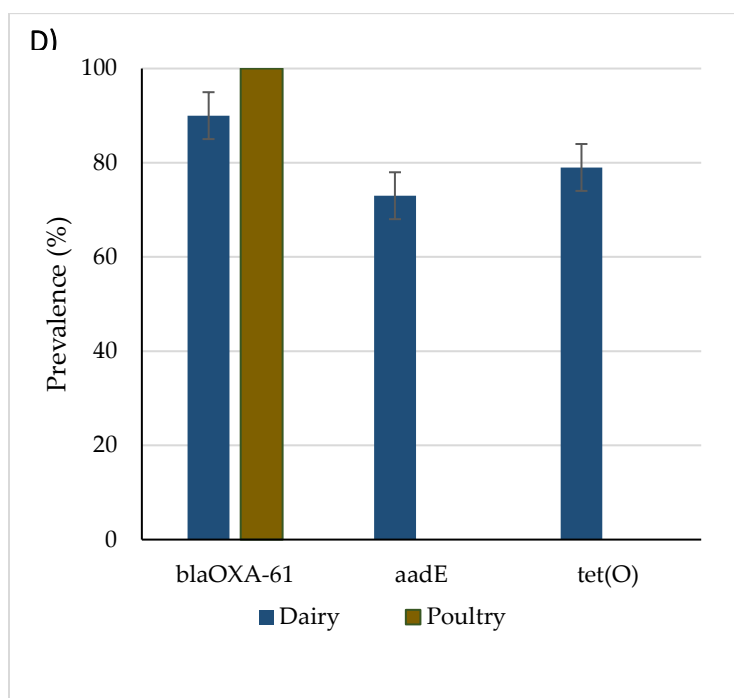

**Figure S2.** Antimicrobial resistance genes of; **A)** *E. coli* O157 **B)** *Salmonella* **C)** *L. monocytogenes* **D)** *Campylobacter* recovered from different manure type.
